# Supplementary material for: Behavior and mechanism investigation of separating Pt and Ir by liquid–liquid extraction using a mixed [C6bet]Br/[C6mim][NTF2] system
Source: Royal Society of Chemistry journal article supplement (doi:10.1039/c7nj02361h), 2017-01-01
Supplement: c7nj02361h1.pdf [file c7nj02361h1.pdf]

# Behavior and mechanism investigation on separating Pt and Ir in liquid-liquid extraction with mixed $[C_6bet]Br/[C_6mim][NTF_2]$ system

## Supporting information

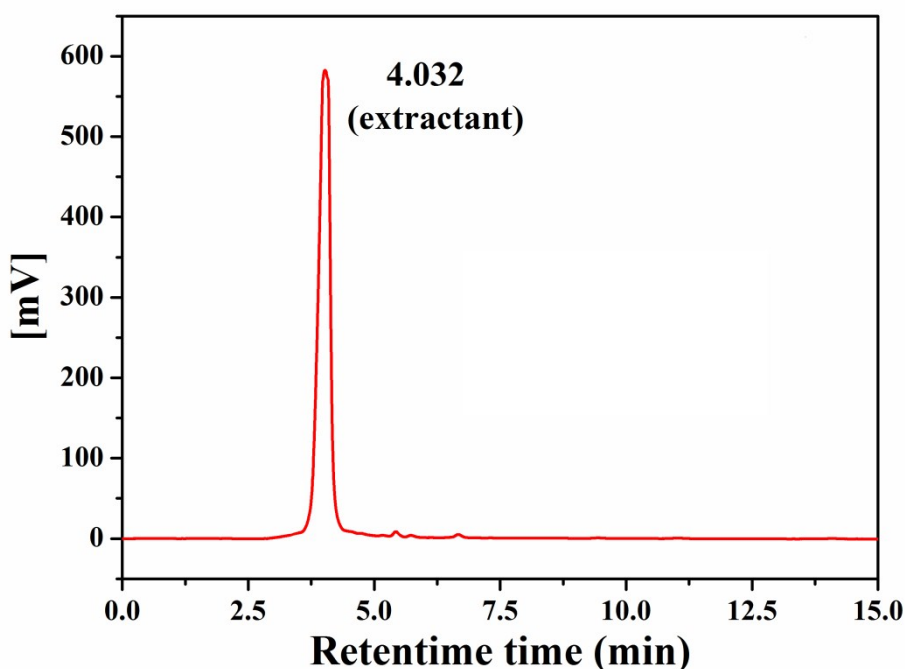

**Fig. S1** The HPLC data for the synthetic  $[C_6bet]Br$ .

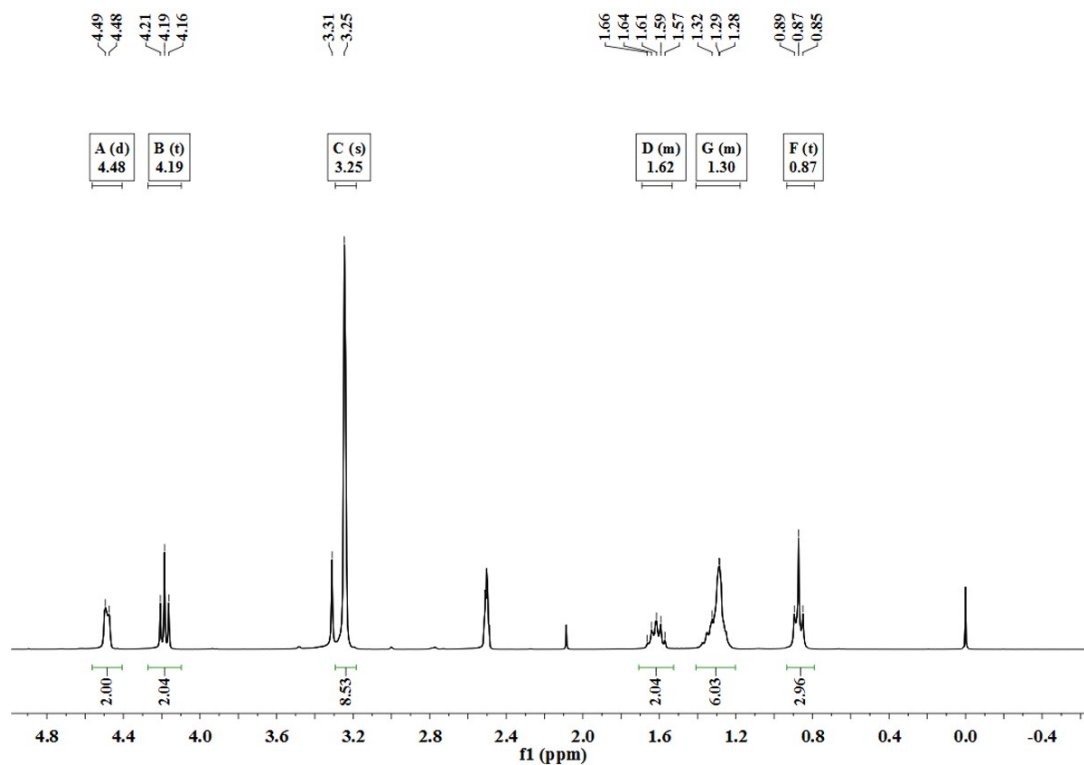

Fig. S2  $^1\text{H}$  NMR spectra of  $[\text{C}_6\text{bet}]\text{Br}$ .

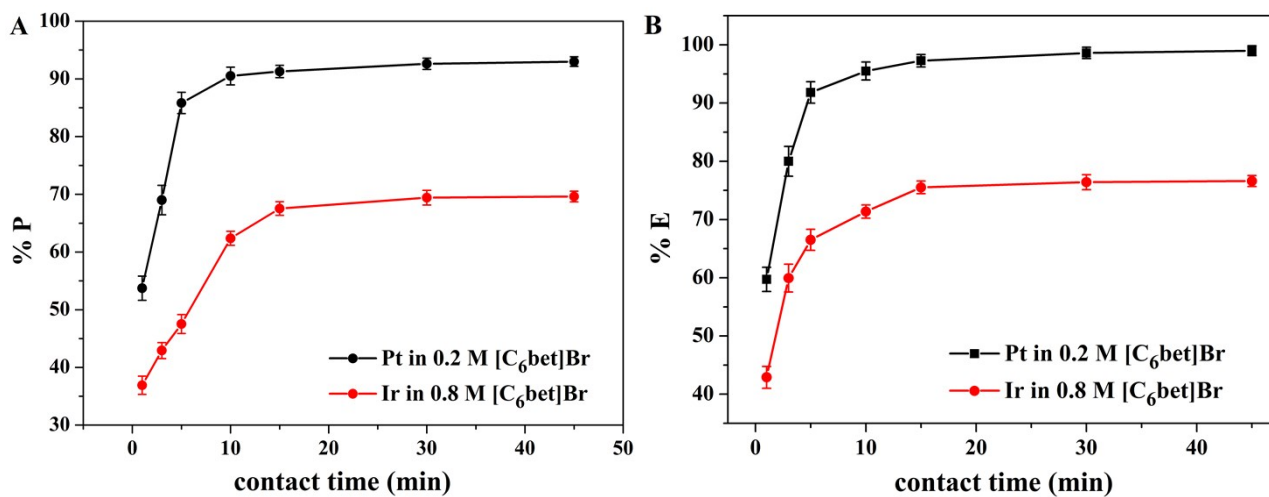

Fig. S3 Effect on the contact time in precipitation (A) and extraction (B) process. Aqueous phase:  $C_{\text{Pt}} = C_{\text{Ir}} = 2 \text{ mM}$
